# Supplementary material
Source: PubMed Central journal article supplement (PMC2613454)
Supplement: JCI0936226sd.pdf [file JCI0936226sd.pdf]

**SUPPLEMENTAL FIGURES**

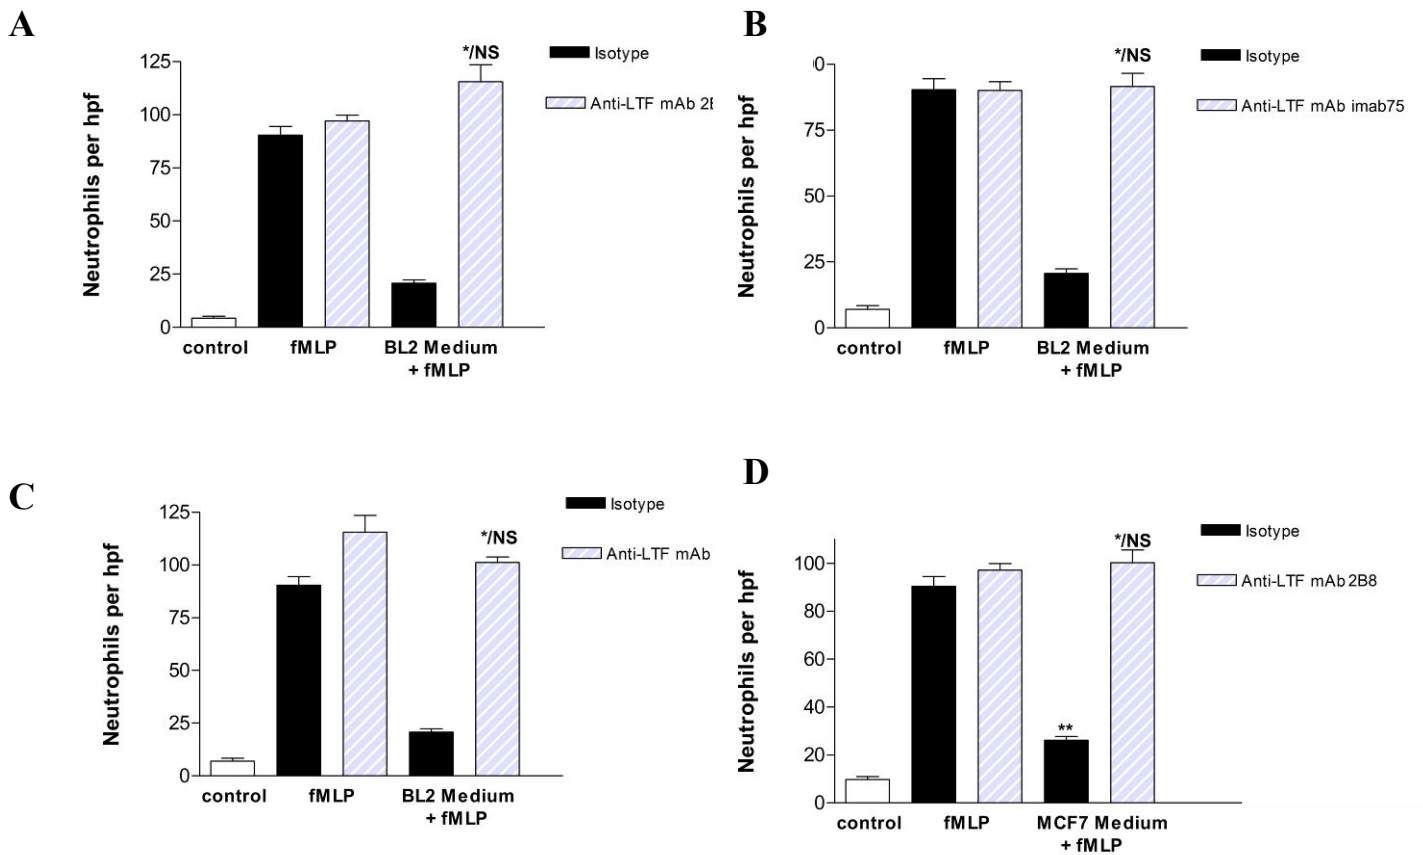

**Supplemental Figure 1: Neutralisation experiments using monoclonal antibodies against human lactoferrin.**

Neutrophil chemotaxis assays in the presence of three independent anti-lactoferrin monoclonal antibodies (grey) or isotype control (black) using conditioned media from BL (A-C) and MCF-7 (D) cells (n=3; \*p<0.05 vs isotype control, NS=non significant vs fMLP anti-lactoferrin control, \*\*p<0.001 compared to fMLP control.) Error bars indicate SEM.

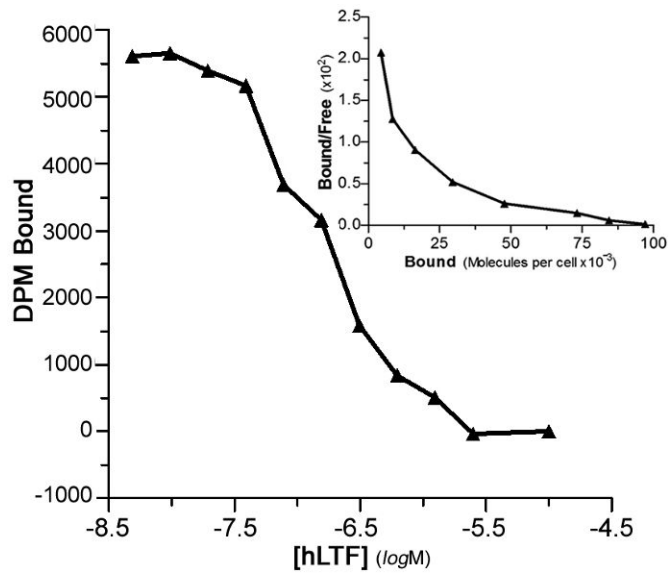

**Supplemental Figure 2: Analysis of <sup>125</sup>I-labelled-lactoferrin binding to human neutrophils.**

Neutrophils ( $2.5 \times 10^6 \text{ ml}^{-1}$ ) were incubated with  $10 \text{ nM}$  <sup>125</sup>I-labelled human milk-derived lactoferrin ( $12.9 \times 10^6 \text{ dpm } \mu\text{g}^{-1}$ ) in the presence of increasing amount of either cold labeled human lactoferrin ( $10 \text{ nM} - 20 \mu\text{M}$ )(specific competitor) or cold BSA ( $10 \text{ nM} - 20 \mu\text{M}$ )(non-specific competitor) for 30 min at  $4^\circ\text{C}$ . Cells were washed three times prior to  $\gamma$  measurement and all data were corrected for non-specific binding. Results are reported as dpm bound at the indicated ligand (cold) concentrations ( $\log\text{M}$ ) and Scatchard analysis plot is shown as inset. Each point represents the mean of three experiments.

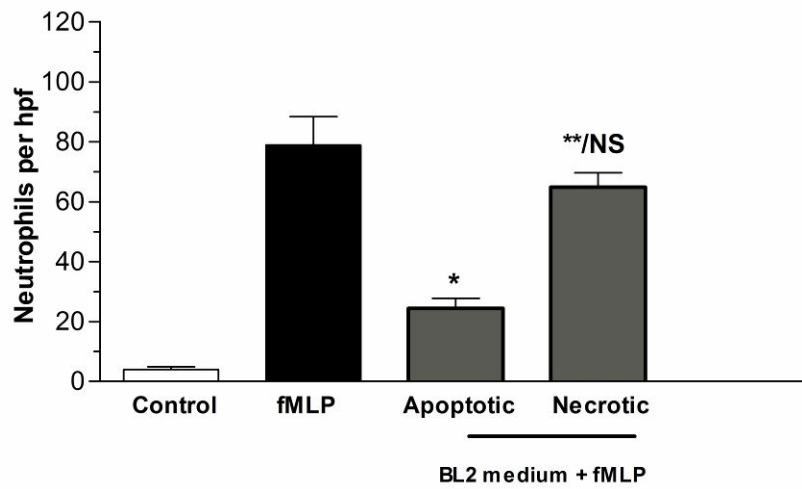

**Supplemental Figure 3: Necrotic BL cells do not produce mediators of neutrophil migration inhibition.**

Neutrophil chemotaxis assay to determine neutrophil migration towards supernatants from BL2 cells stimulated to undergo apoptosis (staurosporine-triggered) or primary necrosis (incubation at 56°C for 1 h) in serum-free conditions (n=3; \*p<0.001 compared to fMLP control; \*\*p<0.05 vs apoptotic control; NS=non significant vs fMLP control). Error bars indicate SEM.
